# Supplementary material for: Composition of early life leukocyte populations in preterm infants with and without late-onset sepsis
Source: PubMed Central journal article supplement (PMC8890632; doi:10.1371/journal.pone.0264768), 2022-03-02
Supplement: pone.0264768.s001.pdf [file pone.0264768.s001.pdf]

# Composition of early life leukocyte populations in preterm infants with and without late-onset sepsis

## Supporting Information

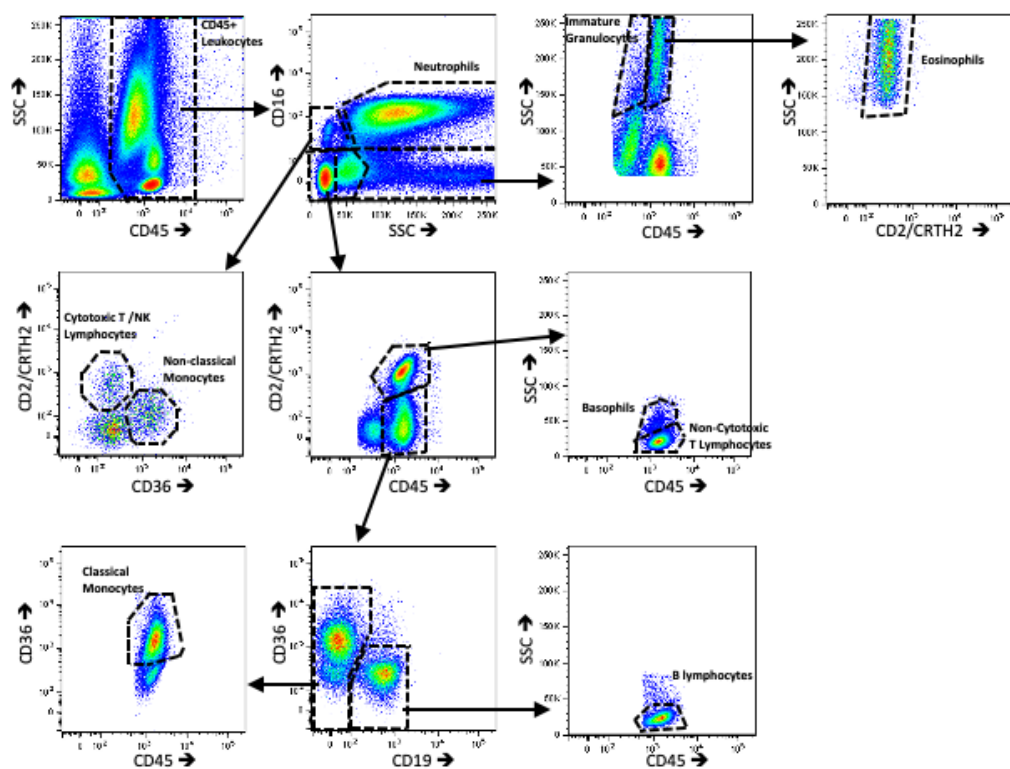

**Figure S1. Leukocyte population gating strategy.** Example plots of CD45<sup>+</sup> leukocytes, neutrophils, basophils, immature granulocytes, eosinophils, classical and non-classical monocytes, non-cytotoxic and cytotoxic T/NK lymphocytes, and B lymphocytes from preterm infant peripheral blood.

**Supplementary Table 1. Descriptive summaries of absolute counts and percentage of total CD45<sup>+</sup> leukocyte populations in preterm infants with and without LOS. Median (95% CI) absolute counts (x 10<sup>9</sup>/L) are presented in the first row and frequencies (%) in the second row of each timepoint.**

|                                    | Any LOS<br>n=43   | Confirmed LOS<br>n=28 | Clinical LOS<br>n=15 | No LOS<br>n=76    |
|------------------------------------|-------------------|-----------------------|----------------------|-------------------|
| <b>CD45<sup>+</sup> Leukocytes</b> |                   |                       |                      |                   |
| Day 1                              | 5.41 (4.03, 7.95) | 5.30 (3.65, 7.46)     | 7.32 (3.84, 11.8)    | 5.83 (4.81, 6.68) |
| Day 7                              | 6.79 (4.51, 9.08) | 5.30 (4.11, 7.49)     | 9.08 (6.95, 11.2)    | 6.11 (5.19, 6.89) |
| Day 14                             | 6.00 (5.05, 7.24) | 5.46 (4.68, 8.24)     | 6.41 (5.57, 7.54)    | 6.29 (5.59, 7.32) |
| Day 21                             | 5.73 (4.86, 6.68) | 5.68 (4.30, 6.81)     | 6.14 (4.84, 7.86)    | 5.45 (4.97, 6.27) |
| Day 28                             | 5.89 (4.35, 6.95) | 4.70 (3.65, 6.35)     | 7.54 (3.68, 8.51)    | 5.76 (5.54, 6.49) |
| <b>Neutrophils</b>                 |                   |                       |                      |                   |
| Day 1                              | 2.15 (1.19, 3.38) | 2.17 (1.17, 4.14)     | 2.11 (0.90, 5.05)    | 2.17 (1.72, 2.78) |
| Day 7                              | 40.4 (36.1, 47.4) | 41.2 (34.7, 48.0)     | 39.8 (17.9, 53.0)    | 38.4 (35.4, 43.3) |
| Day 14                             | 1.96 (1.32, 4.38) | 1.51 (0.83, 3.49)     | 4.38 (2.58, 6.68)    | 2.08 (1.55, 2.41) |
| Day 21                             | 35.0 (28.6, 46.6) | 28.9 (23.6, 39.4)     | 48.1 (31.4, 65.3)    | 32.8 (27.1, 35.8) |
| Day 28                             | 2.48 (1.96, 3.70) | 2.21 (1.31, 3.78)     | 2.89 (2.12, 3.73)    | 2.42 (2.03, 2.92) |
| Day 1                              | 39.3 (35.4, 50.5) | 37.5 (31.1, 50.5)     | 39.4 (38.1, 52.3)    | 38.4 (34.2, 42.6) |
| Day 7                              | 2.09 (1.63, 2.46) | 2.12 (1.49, 2.92)     | 2.02 (1.60, 2.68)    | 1.49 (1.25, 1.79) |
| Day 14                             | 36.4 (32.7, 40.2) | 37.5 (31.4, 43.9)     | 34.2 (31.3, 40.5)    | 29.5 (27.4, 32.0) |
| Day 21                             | 1.77 (1.37, 2.69) | 1.57 (1.07, 2.22)     | 3.30 (0.66, 5.38)    | 1.29 (1.12, 1.66) |
| Day 28                             | 36.5 (28.7, 41.0) | 33.3 (26.31, 40.1)    | 43.6 (23.0, 63.2)    | 23.2 (20.6, 27.1) |
| <b>Basophils</b>                   |                   |                       |                      |                   |
| Day 1                              | 0.03 (0.02, 0.04) | 0.03 (0.02, 0.04)     | 0.02 (0.02, 0.04)    | 0.02 (0.02, 0.03) |
| Day 7                              | 0.40 (0.30, 0.52) | 0.38 (0.33, 0.59)     | 0.38 (0.20, 0.52)    | 0.40 (0.41, 0.52) |
| Day 14                             | 0.03 (0.03, 0.05) | 0.03 (0.03, 0.06)     | 0.04 (0.02, 0.07)    | 0.04 (0.04, 0.05) |
| Day 21                             | 0.55 (0.43, 0.78) | 0.64 (0.43, 0.91)     | 0.49 (0.30, 0.79)    | 0.70 (0.62, 0.83) |
| Day 28                             | 0.03 (0.02, 0.04) | 0.03 (0.02, 0.05)     | 0.03 (0.02, 0.04)    | 0.05 (0.04, 0.06) |
| Day 1                              | 0.60 (0.39, 0.73) | 0.59 (0.44, 0.80)     | 0.39 (0.24, 0.90)    | 0.70 (0.60, 0.87) |
| Day 7                              | 0.03 (0.02, 0.04) | 0.03 (0.02, 0.04)     | 0.03 (0.02, 0.05)    | 0.03 (0.03, 0.04) |
| Day 14                             | 0.50 (0.39, 0.63) | 0.48 (0.37, 0.71)     | 0.41 (0.25, 0.70)    | 0.65 (0.56, 0.70) |
| Day 21                             | 0.02 (0.02, 0.04) | 0.02 (0.02, 0.04)     | 0.03 (0.02, 0.04)    | 0.03 (0.03, 0.03) |
| Day 28                             | 0.40 (0.36, 0.59) | 0.48 (0.31, 0.73)     | 0.42 (0.23, 0.94)    | 0.60 (0.54, 0.66) |
| <b>Immature granulocytes</b>       |                   |                       |                      |                   |
| Day 1                              | 0.10 (0.06, 0.27) | 0.09 (0.05, 0.20)     | 0.21 (0.06, 1.59)    | 0.13 (0.09, 0.20) |
| Day 7                              | 2.40 (1.37, 2.99) | 1.81 (1.21, 2.93)     | 2.69 (1.97, 14.0)    | 2.30 (1.66, 3.15) |
| Day 14                             | 0.19 (0.11, 0.30) | 0.17 (0.09, 0.30)     | 0.22 (0.12, 0.61)    | 0.14 (0.10, 0.21) |
| Day 21                             | 3.05 (1.91, 4.86) | 2.95 (1.75, 5.75)     | 4.67 (1.77, 6.58)    | 2.20 (1.84, 2.83) |
| Day 28                             | 0.18 (0.06, 0.15) | 0.17 (0.09, 0.27)     | 0.22 (0.05, 0.28)    | 0.08 (0.06, 0.11) |
| Day 1                              | 3.00 (1.71, 4.30) | 2.68 (1.71, 5.25)     | 3.10 (0.80, 4.30)    | 1.60 (1.02, 1.96) |
| Day 7                              | 0.11 (0.03, 0.13) | 0.10 (0.04, 0.21)     | 0.11 (0.06, 0.27)    | 0.05 (0.04, 0.07) |
| Day 14                             | 1.77 (1.09, 2.64) | 1.64 (0.65, 3.52)     | 2.09 (0.81, 3.27)    | 1.10 (0.74, 1.35) |
| Day 21                             | 0.06 (0.09, 0.20) | 0.04 (0.03, 0.13)     | 0.09 (0.03, 0.30)    | 0.05 (0.04, 0.06) |
| Day 28                             | 1.10 (0.77, 1.84) | 0.90 (0.55, 1.51)     | 1.84 (1.05, 3.22)    | 0.90 (0.62, 1.28) |
| <b>Eosinophils</b>                 |                   |                       |                      |                   |
| Day 1                              | 0.02 (0.01, 0.03) | 0.01 (0.00, 0.02)     | 0.03 (0.02, 0.07)    | 0.03 (0.02, 0.03) |
| Day 7                              | 0.20 (0.13, 0.62) | 0.14 (0.90, 0.41)     | 0.62 (0.19, 1.03)    | 0.50 (0.31, 0.69) |
| Day 14                             | 0.11 (0.07, 0.15) | 0.10 (0.06, 0.15)     | 0.15 (0.06, 0.24)    | 0.12 (0.09, 0.17) |
| Day 21                             | 1.85 (1.00, 2.61) | 1.80 (0.94, 2.61)     | 2.48 (0.74, 4.79)    | 2.40 (1.65, 2.98) |
| Day 28                             | 0.16 (0.05, 0.23) | 0.14 (0.04, 0.21)     | 0.18 (0.05, 0.40)    | 0.10 (0.07, 0.12) |
| Day 1                              | 2.30 (1.08, 3.54) | 2.52 (0.55, 3.54)     | 2.35 (1.76, 6.33)    | 1.50 (1.24, 1.96) |
| Day 7                              | 0.20 (0.15, 0.32) | 0.20 (0.12, 0.31)     | 0.20 (0.13, 0.58)    | 0.17 (0.13, 0.21) |
| Day 14                             | 3.20 (2.47, 3.65) | 3.17 (2.27, 5.80)     | 3.26 (2.34, 8.07)    | 3.00 (2.42, 4.10) |

|                                    |                                        |                                        |                                        |                                        |
|------------------------------------|----------------------------------------|----------------------------------------|----------------------------------------|----------------------------------------|
| Day 28                             | 0.16 (0.13, 0.24)<br>3.08 (2.35, 3.96) | 0.16 (0.11, 0.31)<br>3.09 (2.33, 4.94) | 0.18 (0.06, 0.33)<br>2.80 (1.94, 7.29) | 0.16 (0.14, 0.23)<br>3.10 (2.30, 4.09) |
| <b>Classical monocytes</b>         |                                        |                                        |                                        |                                        |
| Day 1                              | 0.40 (0.22, 0.61)<br>6.61 (5.54, 7.56) | 0.28 (0.22, 0.61)<br>6.28 (4.64, 7.51) | 0.43 (0.14, 1.13)<br>6.94 (3.12, 9.83) | 0.45 (0.38, 0.53)<br>7.45 (6.22, 8.60) |
| Day 7                              | 0.61 (0.48, 0.78)<br>8.75 (6.36, 11.3) | 0.61 (0.36, 0.84)<br>8.95 (5.85, 11.7) | 0.61 (0.38, 0.78)<br>8.52 (3.77, 14.0) | 0.59 (0.49, 0.68)<br>8.30 (6.57, 10.9) |
| Day 14                             | 0.42 (0.34, 0.61)<br>7.60 (5.68, 8.38) | 0.39 (0.27, 0.54)<br>6.80 (4.98, 8.33) | 0.60 (0.32, 0.69)<br>8.14 (5.86, 10.2) | 0.61 (0.49, 0.71)<br>8.55 (7.35, 9.48) |
| Day 21                             | 0.44 (0.32, 0.58)<br>6.90 (6.01, 8.20) | 0.42 (0.23, 0.58)<br>6.60 (5.61, 7.61) | 0.45 (0.32, 0.69)<br>8.42 (5.54, 11.3) | 0.39 (0.32, 0.50)<br>7.40 (6.40, 8.31) |
| Day 28                             | 0.45 (0.35, 0.53)<br>7.95 (6.91, 8.55) | 0.41 (0.26, 0.54)<br>7.28 (6.31, 11.1) | 0.47 (0.35, 0.79)<br>8.07 (5.37, 9.15) | 0.46 (0.38, 0.54)<br>7.80 (6.74, 9.02) |
| <b>Non-classical monocytes</b>     |                                        |                                        |                                        |                                        |
| Day 1                              | 0.05 (0.04, 0.09)<br>0.90 (0.69, 1.17) | 0.05 (0.03, 0.09)<br>0.79 (0.60, 1.12) | 0.05 (0.03, 0.15)<br>1.08 (0.67, 1.31) | 0.07 (0.05, 0.09)<br>0.95 (0.84, 1.27) |
| Day 7                              | 0.06 (0.05, 0.10)<br>0.90 (0.60, 1.33) | 0.06 (0.03, 0.10)<br>0.93 (0.36, 1.62) | 0.06 (0.05, 0.12)<br>0.90 (0.60, 1.82) | 0.06 (0.05, 0.08)<br>1.00 (0.79, 1.20) |
| Day 14                             | 0.08 (0.05, 0.12)<br>1.24 (0.96, 1.72) | 0.06 (0.04, 0.10)<br>1.05 (0.77, 1.38) | 0.12 (0.06, 0.15)<br>1.72 (0.96, 3.01) | 0.09 (0.07, 0.12)<br>1.40 (1.19, 1.60) |
| Day 21                             | 0.08 (0.06, 0.13)<br>1.40 (1.14, 1.84) | 0.08 (0.05, 0.13)<br>1.37 (1.05, 1.84) | 0.12 (0.06, 0.18)<br>1.68 (1.00, 2.79) | 0.06 (0.05, 0.09)<br>1.10 (0.94, 1.42) |
| Day 28                             | 0.08 (0.06, 0.11)<br>1.64 (1.31, 1.98) | 0.07 (0.06, 0.11)<br>1.68 (1.13, 2.10) | 0.11 (0.04, 0.20)<br>1.54 (1.10, 2.29) | 0.07 (0.06, 0.10)<br>1.50 (1.21, 1.70) |
| <b>Non-cytotoxic T lymphocytes</b> |                                        |                                        |                                        |                                        |
| Day 1                              | 0.92 (0.61, 1.09)<br>13.6 (11.7, 17.9) | 0.89 (0.41, 1.11)<br>14.9 (11.7, 22.1) | 1.02 (0.53, 1.36)<br>13.1 (7.48, 21.4) | 0.95 (0.83, 1.26)<br>19.5 (16.9, 21.1) |
| Day 7                              | 1.10 (0.87, 1.32)<br>20.3 (13.8, 24.9) | 1.27 (0.87, 1.86)<br>24.9 (17.1, 32.4) | 0.96 (0.66, 1.31)<br>12.0 (8.13, 20.9) | 1.51 (1.27, 2.00)<br>27.0 (24.4, 29.9) |
| Day 14                             | 1.07 (0.83, 1.38)<br>15.5 (13.5, 24.7) | 1.21 (0.81, 1.60)<br>16.7 (13.0, 26.3) | 0.86 (0.66, 1.31)<br>14.5 (12.0, 21.7) | 1.55 (1.23, 1.76)<br>25.2 (20.2, 27.3) |
| Day 21                             | 1.11 (0.91, 1.67)<br>18.6 (14.7, 25.4) | 1.62 (0.94, 1.79)<br>22.9 (15.1, 27.5) | 1.01 (0.46, 1.17)<br>15.2 (9.39, 20.8) | 1.71 (1.43, 1.95)<br>30.1 (26.5, 33.0) |
| Day 28                             | 1.15 (0.76, 1.42)<br>21.7 (16.6, 29.1) | 1.27 (0.75, 1.60)<br>23.5 (16.6, 30.1) | 0.93 (0.44, 1.85)<br>19.2 (9.22, 31.9) | 1.95 (1.63, 2.15)<br>32.4 (30.3, 35.8) |
| <b>Cytotoxic T/NK lymphocytes</b>  |                                        |                                        |                                        |                                        |
| Day 1                              | 0.03 (0.02, 0.05)<br>0.50 (0.28, 0.77) | 0.03 (0.02, 0.04)<br>0.53 (0.27, 0.77) | 0.05 (0.03, 0.10)<br>0.64 (0.25, 1.10) | 0.03 (0.03, 0.05)<br>0.50 (0.46, 0.77) |
| Day 7                              | 0.02 (0.02, 0.03)<br>0.40 (0.31, 0.48) | 0.02 (0.01, 0.03)<br>0.40 (0.23, 0.55) | 0.02 (0.01, 0.06)<br>0.34 (0.18, 0.65) | 0.03 (0.03, 0.04)<br>0.50 (0.39, 0.57) |
| Day 14                             | 0.04 (0.02, 0.05)<br>0.50 (0.33, 0.75) | 0.03 (0.02, 0.05)<br>0.44 (0.27, 0.71) | 0.04 (0.01, 0.07)<br>0.74 (0.20, 1.04) | 0.03 (0.03, 0.04)<br>0.50 (0.47, 0.59) |
| Day 21                             | 0.05 (0.04, 0.06)<br>0.90 (0.69, 1.18) | 0.06 (0.04, 0.09)<br>0.99 (0.70, 1.38) | 0.04 (0.02, 0.06)<br>0.60 (0.30, 1.13) | 0.04 (0.03, 0.05)<br>0.75 (0.57, 0.87) |
| Day 28                             | 0.05 (0.03, 0.06)<br>1.00 (0.74, 1.27) | 0.06 (0.04, 0.09)<br>1.12 (0.74, 1.41) | 0.05 (0.03, 0.07)<br>0.75 (0.39, 1.32) | 0.06 (0.05, 0.08)<br>1.10 (0.80, 1.22) |
| <b>B lymphocytes</b>               |                                        |                                        |                                        |                                        |
| Day 1                              | 0.20 (0.16, 0.30)<br>3.10 (2.50, 4.95) | 0.19 (0.16, 0.35)<br>3.66 (2.11, 6.79) | 0.25 (0.11, 0.33)<br>2.73 (2.16, 5.01) | 0.21 (0.18, 0.26)<br>3.85 (2.97, 4.56) |
| Day 7                              | 0.22 (0.13, 0.32)<br>2.90 (2.48, 3.73) | 0.23 (0.13, 0.38)<br>3.18 (2.64, 5.29) | 0.17 (0.08, 0.35)<br>2.44 (1.07, 3.68) | 0.25 (0.19, 0.30)<br>3.60 (3.10, 4.08) |
| Day 14                             | 0.23 (0.18, 0.31)<br>4.20 (3.18, 5.52) | 0.26 (0.19, 0.40)<br>4.47 (3.43, 5.79) | 0.19 (0.13, 0.33)<br>2.77 (2.02, 6.98) | 0.30 (0.22, 0.35)<br>4.25 (3.04, 5.60) |
| Day 21                             | 0.28 (0.18, 0.38)<br>4.60 (3.20, 5.52) | 0.31 (0.18, 0.50)<br>5.01 (3.27, 7.41) | 0.21 (0.12, 0.38)<br>3.35 (2.46, 4.73) | 0.25 (0.20, 0.34)<br>4.10 (3.47, 5.33) |

|        |                   |                   |                   |                   |
|--------|-------------------|-------------------|-------------------|-------------------|
| Day 28 | 0.25 (0.21, 0.35) | 0.31 (0.13, 0.49) | 0.23 (0.13, 0.28) | 0.37 (0.23, 0.45) |
|        | 4.45 (3.21, 5.96) | 5.65 (3.31, 7.93) | 3.21 (2.33, 5.93) | 6.40 (4.62, 7.59) |

---

**Supplementary Table 2. Basic clinical characteristics of the infants with confirmed and clinical LOS**

|                                     | <b>Confirmed LOS<br/>n=28</b> | <b>Clinical LOS<br/>n=15</b> | <b>P value</b> |
|-------------------------------------|-------------------------------|------------------------------|----------------|
| Gestational age (weeks)             | 26.6 (25.4-28.3)              | 25.4 (24.7-26.4)             | 0.069          |
| Birthweight (grams)                 | 835 (690-1028)                | 705 (600-865)                | 0.119          |
| Birthweight z-score                 | -0.06 (-0.75-0.21)            | -0.04 (-0.98-0.65)           | 0.855          |
| Males                               | 15 (53.6)                     | 7 (46.7)                     | 0.755          |
| Multiple birth                      | 7 (25.0)                      | 2 (13.3)                     | 0.458          |
| Caesarean section                   | 16 (57.1)                     | 9 (60.0)                     | >0.999         |
| ROM                                 | 8 (28.6)                      | 9 (60.0)                     | 0.057          |
| Antenatal steroids                  | 25 (89.3)                     | 15 (100)                     | 0.302          |
| Apgar <7 at 5 min                   | 8 (28.6)                      | 4 (26.7)                     | >0.999         |
| Chorioamnionitis <sup>^</sup>       | 9/26 (34.6)                   | 9/14 (64.3)                  | 0.101          |
| Mechanical ventilation              | 27 (96.4)                     | 14 (93.3)                    | >0.999         |
| Duration (hours)                    | 177 (27-773)                  | 393 (153-1337)               | 0.116          |
| Continuous positive airway pressure | 28 (100)                      | 15 (100)                     | >0.999         |
| Duration (hours)                    | 845 (642-1243)                | 952 (655-1164)               | 0.990          |
| IVH (grade III/IV)                  | 1 (3.6)                       | 3 (20.0)                     | 0.114          |
| Chronic lung disease                | 8 (28.6)                      | 7 (46.7)                     | 0.318          |
| ROP (stage III/IV) <sup>^</sup>     | 1/25 (4.0)                    | 1/15 (6.7)                   | >0.999         |
| Length of NICU stay (days)          | 99 (60-117)                   | 105 (94-164)                 | 0.182          |
| Mortality to 28 days                | 0 (0)                         | 0 (0)                        | >0.999         |
| Age at sepsis onset (days)          | 11 (9-16)                     | 16 (10-20)                   | 0.130          |
| Highest CRP (mg/L)*                 | 57(31-91)                     | 26(19-45)                    | <b>0.004</b>   |

Data are expressed as median (IQR) or n (%), as appropriate. <sup>^</sup>from available reports. \* Within 72 hour of blood culture. ROM, rupture of membranes >24 hours prior to delivery; IVH, intraventricular haemorrhage; ROP, retinopathy of prematurity. CRP, C-reactive protein.

**Supplementary Table 3. Descriptive summaries of adjusted absolute counts and percentage of total CD45<sup>+</sup> leukocyte populations in preterm infants with and without LOS. Estimated marginal mean (95% CI) absolute counts (x 10<sup>9</sup>/L) are presented in the first row and frequencies (%) in the second row of each timepoint.**

|                                    | Any LOS<br>n=43   | Confirmed LOS<br>n=28 | Clinical LOS<br>n=15 | No LOS<br>n=76    |
|------------------------------------|-------------------|-----------------------|----------------------|-------------------|
| <b>CD45<sup>+</sup> Leukocytes</b> |                   |                       |                      |                   |
| Day 1                              | 6.03 (5.11, 7.12) | 5.30 (3.65, 7.46)     | 7.32 (3.84, 11.8)    | 5.59 (4.94, 6.32) |
| Day 7                              | 6.50 (5.59, 7.57) | 5.30 (4.11, 7.49)     | 9.08 (6.95, 11.2)    | 5.90 (5.25, 6.62) |
| Day 14                             | 6.20 (5.38, 7.15) | 5.46 (4.68, 8.24)     | 6.41 (5.57, 7.54)    | 6.51 (5.84, 7.25) |
| Day 21                             | 5.90 (5.15, 6.76) | 5.68 (4.30, 6.81)     | 6.14 (4.84, 7.86)    | 5.54 (4.98, 6.16) |
| Day 28                             | 5.43 (4.72, 6.23) | 4.70 (3.65, 6.35)     | 7.54 (3.68, 8.51)    | 5.57 (5.00, 6.19) |
| <b>Neutrophils</b>                 |                   |                       |                      |                   |
| Day 1                              | 1.57 (1.30, 1.89) | 2.00 (1.44, 2.78)     | 1.38 (0.88, 2.17)    | 2.26 (1.98, 2.59) |
|                                    | 36.6 (32.9, 40.3) | 42.3 (37.0, 47.7)     | 33.7 (26.3, 41.1)    | 40.9 (38.2, 43.7) |
| Day 7                              | 1.55 (1.29, 1.87) | 1.51 (1.09, 2.10)     | 2.25 (1.43, 3.53)    | 1.91 (1.66, 2.19) |
|                                    | 34.4 (30.8, 38.1) | 33.8 (28.4, 39.1)     | 43.3 (36.1, 50.5)    | 34.7 (31.9, 37.6) |
| Day 14                             | 1.93 (1.59, 2.35) | 2.06 (1.48, 2.87)     | 2.39 (1.50, 3.82)    | 2.22 (1.92, 2.57) |
|                                    | 38.8 (35.1, 42.5) | 41.1 (35.9, 46.2)     | 42.4 (34.8, 49.9)    | 39.5 (36.7, 42.4) |
| Day 21                             | 1.65 (1.35, 2.02) | 1.82 (1.30, 2.56)     | 1.89 (1.19, 3.02)    | 1.79 (1.53, 2.10) |
|                                    | 34.0 (30.3, 37.6) | 36.9 (31.8, 42.0)     | 36.4 (29.4, 43.4)    | 33.0 (30.1, 35.9) |
| Day 28                             | 1.60 (1.28, 2.01) | 1.66 (1.16, 2.37)     | 2.03 (1.25, 3.31)    | 1.46 (1.23, 1.73) |
|                                    | 34.4 (30.6, 38.1) | 35.3 (30.0, 40.5)     | 40.8 (33.8, 47.9)    | 28.0 (25.1, 30.9) |
| <b>Basophils</b>                   |                   |                       |                      |                   |
| Day 1                              | 0.02 (0.02, 0.03) | 0.02 (0.02, 0.03)     | 0.02 (0.02, 0.03)    | 0.02 (0.02, 0.03) |
|                                    | 0.41 (0.35, 0.49) | 0.40 (0.32, 0.49)     | 0.36 (0.26, 0.49)    | 0.42 (0.37, 0.48) |
| Day 7                              | 0.03 (0.03, 0.04) | 0.03 (0.03, 0.04)     | 0.03 (0.02, 0.04)    | 0.04 (0.03, 0.05) |
|                                    | 0.56 (0.47, 0.67) | 0.54 (0.43, 0.67)     | 0.49 (0.36, 0.67)    | 0.67 (0.59, 0.77) |
| Day 14                             | 0.03 (0.03, 0.04) | 0.03 (0.02, 0.04)     | 0.03 (0.02, 0.04)    | 0.04 (0.03, 0.05) |
|                                    | 0.52 (0.43, 0.62) | 0.47 (0.38, 0.60)     | 0.49 (0.35, 0.69)    | 0.68 (0.59, 0.78) |
| Day 21                             | 0.03 (0.02, 0.03) | 0.03 (0.02, 0.03)     | 0.03 (0.02, 0.04)    | 0.03 (0.03, 0.04) |
|                                    | 0.49 (0.41, 0.59) | 0.45 (0.36, 0.57)     | 0.47 (0.34, 0.64)    | 0.56 (0.48, 0.64) |
| Day 28                             | 0.03 (0.02, 0.03) | 0.03 (0.02, 0.03)     | 0.03 (0.02, 0.04)    | 0.03 (0.03, 0.03) |
|                                    | 0.48 (0.40, 0.58) | 0.43 (0.33, 0.55)     | 0.47 (0.34, 0.66)    | 0.51 (0.44, 0.59) |
| <b>Immature granulocytes</b>       |                   |                       |                      |                   |
| Day 1                              | 0.15 (0.12, 0.20) | 0.15 (0.10, 0.20)     | 0.24 (0.15, 0.38)    | 0.16 (0.13, 0.20) |
|                                    | 2.62 (2.01, 3.43) | 2.41 (1.73, 3.35)     | 3.99 (2.53, 6.27)    | 2.75 (2.25, 3.34) |
| Day 7                              | 0.16 (0.12, 0.20) | 0.17 (0.12, 0.25)     | 0.17 (0.11, 0.28)    | 0.15 (0.12, 0.18) |
|                                    | 2.65 (2.03, 3.47) | 2.88 (2.03, 4.06)     | 2.88 (1.80, 4.61)    | 2.48 (2.02, 3.06) |
| Day 14                             | 0.14 (0.10, 0.18) | 0.16 (0.11, 0.23)     | 0.13 (0.08, 0.22)    | 0.09 (0.07, 0.11) |
|                                    | 2.32 (1.76, 3.07) | 2.69 (1.88, 3.85)     | 2.20 (1.31, 3.71)    | 1.49 (1.21, 1.85) |
| Day 21                             | 0.10 (0.07, 0.13) | 0.11 (0.07, 0.16)     | 0.11 (0.06, 0.18)    | 0.07 (0.05, 0.08) |
|                                    | 1.62 (1.21, 2.16) | 1.79 (1.22, 2.62)     | 1.76 (1.04, 2.96)    | 1.11 (0.88, 1.39) |
| Day 28                             | 0.07 (0.05, 0.10) | 0.07 (0.05, 0.11)     | 0.10 (0.06, 0.17)    | 0.06 (0.04, 0.07) |
|                                    | 1.22 (0.89, 1.68) | 1.22 (0.81, 1.86)     | 1.65 (0.94, 2.89)    | 0.97 (0.75, 1.24) |
| <b>Eosinophils</b>                 |                   |                       |                      |                   |
| Day 1                              | 0.02 (0.01, 0.02) | 0.01 (0.01, 0.02)     | 0.03 (0.02, 0.05)    | 0.02 (0.02, 0.03) |
|                                    | 0.26 (0.18, 0.37) | 0.19 (0.12, 0.30)     | 0.48 (0.26, 0.90)    | 0.40 (0.31, 0.52) |
| Day 7                              | 0.09 (0.06, 0.12) | 0.08 (0.05, 0.12)     | 0.12 (0.06, 0.23)    | 0.12 (0.09, 0.16) |
|                                    | 1.46 (1.03, 2.08) | 1.28 (0.79, 2.05)     | 1.98 (1.04, 3.77)    | 2.02 (1.55, 2.64) |
| Day 14                             | 0.09 (0.06, 0.13) | 0.08 (0.05, 0.13)     | 0.14 (0.07, 0.28)    | 0.09 (0.07, 0.11) |
|                                    | 1.54 (1.08, 2.19) | 1.28 (0.78, 2.08)     | 2.26 (1.11, 4.59)    | 1.45 (1.11, 1.91) |
| Day 21                             | 0.15 (0.10, 0.21) | 0.13 (0.08, 0.22)     | 0.20 (0.10, 0.41)    | 0.16 (0.12, 0.22) |
|                                    | 2.53 (1.77, 3.63) | 2.18 (1.30, 3.65)     | 3.33 (1.64, 6.76)    | 2.79 (2.10, 3.69) |

|                                    |                                        |                                        |                                        |                                        |
|------------------------------------|----------------------------------------|----------------------------------------|----------------------------------------|----------------------------------------|
| Day 28                             | 0.15 (0.10, 0.21)<br>2.47 (1.69, 3.62) | 0.16 (0.09, 0.27)<br>2.60 (1.49, 4.53) | 0.13 (0.06, 0.28)<br>2.19 (1.03, 4.66) | 0.16 (0.12, 0.22)<br>2.75 (2.05, 3.70) |
| <b>Classical monocytes</b>         |                                        |                                        |                                        |                                        |
| Day 1                              | 0.33 (0.25, 0.42)<br>5.53 (4.27, 7.17) | 0.31 (0.24, 0.40)<br>5.13 (3.95, 6.66) | 0.33 (0.23, 0.48)<br>5.50 (3.84, 7.86) | 0.37 (0.31, 0.45)<br>6.32 (5.23, 7.64) |
| Day 7                              | 0.45 (0.34, 0.59)<br>7.62 (5.83, 9.06) | 0.42 (0.33, 0.55)<br>7.01 (5.43, 9.06) | 0.46 (0.32, 0.65)<br>7.56 (5.34, 10.7) | 0.43 (0.35, 0.53)<br>7.36 (6.00, 9.01) |
| Day 14                             | 0.40 (0.30, 0.52)<br>6.73 (5.10, 8.87) | 0.33 (0.26, 0.42)<br>5.43 (4.25, 6.94) | 0.54 (0.38, 0.77)<br>8.92 (6.22, 12.8) | 0.41 (0.33, 0.50)<br>6.88 (5.59, 8.48) |
| Day 21                             | 0.42 (0.32, 0.56)<br>7.13 (5.38, 9.46) | 0.35 (0.27, 0.44)<br>5.73 (4.51, 7.27) | 0.56 (0.41, 0.78)<br>9.34 (6.73, 13.0) | 0.36 (0.29, 0.45)<br>6.08 (4.90, 7.55) |
| Day 28                             | 0.47 (0.35, 0.63)<br>7.89 (5.88, 10.6) | 0.46 (0.36, 0.58)<br>7.53 (5.92, 9.59) | 0.47 (0.34, 0.65)<br>7.74 (5.60, 10.7) | 0.37 (0.29, 0.46)<br>6.20 (4.96, 7.74) |
| <b>Non-classical monocytes</b>     |                                        |                                        |                                        |                                        |
| Day 1                              | 0.05 (0.04, 0.06)<br>0.77 (0.62, 0.96) | 0.05 (0.04, 0.07)<br>0.80 (0.60, 1.08) | 0.05 (0.03, 0.08)<br>0.85 (0.56, 1.28) | 0.06 (0.05, 0.07)<br>1.06 (0.90, 1.24) |
| Day 7                              | 0.05 (0.04, 0.06)<br>0.81 (0.66, 1.00) | 0.05 (0.04, 0.06)<br>0.78 (0.59, 1.05) | 0.06 (0.04, 0.09)<br>1.02 (0.69, 1.51) | 0.06 (0.05, 0.07)<br>1.04 (0.88, 1.22) |
| Day 14                             | 0.07 (0.05, 0.08)<br>1.10 (0.90, 1.35) | 0.06 (0.05, 0.08)<br>1.02 (0.77, 1.35) | 0.09 (0.06, 0.14)<br>1.57 (1.04, 2.35) | 0.08 (0.07, 0.10)<br>1.43 (1.23, 1.68) |
| Day 21                             | 0.08 (0.07, 0.10)<br>1.37 (1.13, 1.67) | 0.08 (0.06, 0.11)<br>1.35 (1.03, 1.78) | 0.10 (0.07, 0.15)<br>1.67 (1.15, 2.43) | 0.07 (0.06, 0.09)<br>1.25 (1.07, 1.46) |
| Day 28                             | 0.08 (0.07, 0.10)<br>1.36 (1.11, 1.67) | 0.08 (0.06, 0.11)<br>1.40 (1.06, 1.85) | 0.09 (0.06, 0.13)<br>1.53 (1.05, 2.23) | 0.09 (0.07, 0.10)<br>1.46 (1.25, 1.71) |
| <b>Non-cytotoxic T lymphocytes</b> |                                        |                                        |                                        |                                        |
| Day 1                              | 0.88 (0.76, 1.01)<br>18.0 (15.3, 20.5) | 0.71 (0.59, 0.86)<br>14.2 (11.2, 17.2) | 0.93 (0.71, 1.20)<br>18.7 (14.6, 22.8) | 0.98 (0.88, 1.08)<br>18.3 (16.5, 20.1) |
| Day 7                              | 1.24 (1.08, 1.41)<br>24.4 (21.8, 26.9) | 1.28 (1.07, 1.53)<br>24.6 (21.7, 27.4) | 0.87 (0.68, 1.11)<br>17.8 (13.9, 21.7) | 1.36 (1.23, 1.51)<br>25.6 (23.7, 27.5) |
| Day 14                             | 1.14 (1.00, 1.30)<br>21.6 (19.0, 24.3) | 1.01 (0.85, 1.20)<br>19.6 (16.8, 22.4) | 1.05 (0.82, 1.36)<br>19.1 (15.1, 23.2) | 1.25 (1.13, 1.38)<br>23.5 (21.5, 25.6) |
| Day 21                             | 1.17 (1.03, 1.34)<br>22.3 (19.5, 25.2) | 1.15 (0.95, 1.37)<br>21.7 (18.6, 24.7) | 0.88 (0.68, 1.13)<br>16.9 (12.7, 21.1) | 1.47 (1.33, 1.63)<br>27.7 (25.5, 29.9) |
| Day 28                             | 1.25 (1.09, 1.45)<br>23.9 (20.8, 27.1) | 1.16 (0.95, 1.41)<br>22.1 (18.6, 25.6) | 1.02 (0.78, 1.34)<br>20.3 (15.6, 25.1) | 1.59 (1.42, 1.78)<br>30.4 (27.9, 32.8) |
| <b>Cytotoxic T/NK lymphocytes</b>  |                                        |                                        |                                        |                                        |
| Day 1                              | 0.03 (0.03, 0.04)<br>0.56 (0.44, 0.71) | 0.03 (0.02, 0.04)<br>0.43 (0.31, 0.59) | 0.04 (0.03, 0.07)<br>0.71 (0.46, 1.10) | 0.03 (0.03, 0.04)<br>0.58 (0.48, 0.69) |
| Day 7                              | 0.02 (0.02, 0.03)<br>0.37 (0.29, 0.46) | 0.02 (0.01, 0.03)<br>0.33 (0.24, 0.46) | 0.02 (0.01, 0.03)<br>0.36 (0.23, 0.55) | 0.03 (0.02, 0.03)<br>0.47 (0.40, 0.57) |
| Day 14                             | 0.03 (0.02, 0.04)<br>0.52 (0.41, 0.65) | 0.03 (0.02, 0.04)<br>0.43 (0.31, 0.59) | 0.04 (0.02, 0.06)<br>0.60 (0.38, 0.96) | 0.03 (0.02, 0.04)<br>0.51 (0.42, 0.60) |
| Day 21                             | 0.05 (0.04, 0.07)<br>0.89 (0.70, 1.12) | 0.06 (0.04, 0.08)<br>0.94 (0.68, 1.29) | 0.04 (0.02, 0.06)<br>0.62 (0.40, 0.96) | 0.04 (0.03, 0.05)<br>0.66 (0.55, 0.79) |
| Day 28                             | 0.06 (0.04, 0.07)<br>0.96 (0.74, 1.23) | 0.06 (0.04, 0.08)<br>0.95 (0.68, 1.31) | 0.05 (0.03, 0.07)<br>0.75 (0.48, 1.15) | 0.05 (0.04, 0.06)<br>0.87 (0.72, 1.06) |
| <b>B lymphocytes</b>               |                                        |                                        |                                        |                                        |
| Day 1                              | 0.17 (0.12, 0.24)<br>2.95 (2.11, 4.14) | 0.17 (0.10, 0.27)<br>2.77 (1.70, 4.51) | 0.15 (0.08, 0.29)<br>2.43 (1.25, 4.75) | 0.18 (0.14, 0.24)<br>3.11 (2.42, 3.99) |
| Day 7                              | 0.18 (0.13, 0.25)<br>3.08 (2.28, 4.16) | 0.22 (0.15, 0.33)<br>3.65 (2.44, 5.46) | 0.01 (0.06, 0.17)<br>1.65 (0.95, 2.86) | 0.18 (0.14, 0.23)<br>3.06 (2.43, 3.85) |
| Day 14                             | 0.25 (0.19, 0.33)<br>4.26 (3.21, 5.66) | 0.23 (0.17, 0.32)<br>3.84 (2.77, 5.32) | 0.23 (0.15, 0.37)<br>3.88 (2.43, 6.18) | 0.22 (0.18, 0.27)<br>3.69 (2.97, 4.59) |
| Day 21                             | 0.27 (0.21, 0.36)<br>4.64 (3.49, 6.17) | 0.28 (0.21, 0.38)<br>4.70 (3.55, 6.22) | 0.20 (0.14, 0.29)<br>3.30 (2.25, 4.85) | 0.21 (0.17, 0.26)<br>3.54 (2.83, 4.42) |

|        |                   |                   |                   |                   |
|--------|-------------------|-------------------|-------------------|-------------------|
| Day 28 | 0.27 (0.20, 0.37) | 0.28 (0.21, 0.37) | 0.21 (0.14, 0.30) | 0.26 (0.20, 0.33) |
|        | 4.61 (3.35, 6.33) | 4.58 (3.45, 6.08) | 3.40 (2.32, 4.97) | 4.32 (3.38, 5.54) |

---



**Supplementary Table 4. Adjusted mean (95% CI) percentage changes overtime in absolute counts and frequency percentages of total CD45<sup>+</sup> leukocyte populations in preterm infants with and without LOS. Pairwise comparisons were corrected for ten multiple tests using the Bonferroni method to maintain an overall alpha error rate of 0.05.**

|                              | Any LOS        |                | Confirmed LOS |                | Clinical LOS  |                | No LOS         |                  |
|------------------------------|----------------|----------------|---------------|----------------|---------------|----------------|----------------|------------------|
|                              | n=43           | <i>P</i> value | n=28          | <i>P</i> value | n=15          | <i>P</i> value | n=76           | <i>P</i> value   |
| <b>Neutrophils</b>           |                |                |               |                |               |                |                |                  |
| Day 7 vs Day 1               | -1 (-22, 26)   | 1.000          | -24 (-49, 11) | 0.436          | 63 (-3, 175)  | 0.085          | -16 (-30, 2)   | 0.113            |
| Day 14 vs Day 1              | 23 (-5, 60)    | 0.236          | 3 (-31, 54)   | 1.000          | 74 (-1, 206)  | 0.062          | -2 (-20, 20)   | 1.000            |
| Day 21 vs Day 1              | 5 (-21, 40)    | 1.000          | -9 (-40, 39)  | 1.000          | 38 (-23, 145) | 1.000          | -21 (-36, -1)  | <b>0.034</b>     |
| Day 28 vs Day 1              | 2 (-25, 40)    | 1.000          | -17 (-47, 32) | 1.000          | 48 (-21, 175) | 0.791          | -35 (-49, -17) | <b>&lt;0.001</b> |
| Day 14 vs Day 7              | 24 (-3, 59)    | 0.127          | 36 (-7, 101)  | 0.241          | 6 (-38, 84)   | 1.000          | 17 (-4, 42)    | 0.248            |
| Day 21 vs Day 7              | 6 (-18, 38)    | 1.000          | 20 (-19, 80)  | 1.000          | -16 (-51, 46) | 1.000          | -6 (-23, 16)   | 1.000            |
| Day 28 vs Day 7              | 3 (-22, 37)    | 1.000          | 10 (-29, 69)  | 1.000          | -10 (-49, 62) | 1.000          | -23 (-39, -4)  | <b>0.009</b>     |
| Day 21 vs Day 14             | -15 (-33, 9)   | 0.696          | -12 (-40, 29) | 1.000          | -21 (-54, 37) | 1.000          | -19 (-34, -2)  | <b>0.019</b>     |
| Day 28 vs Day 14             | -17 (-36, 8)   | 0.461          | -20 (-46, 21) | 1.000          | -15 (-52, 50) | 1.000          | -34 (-46, -19) | <b>&lt;0.001</b> |
| Day 28 vs Day 21             | -3 (-24, 24)   | 1.000          | -9 (-38, 34)  | 1.000          | 7 (-36, 81)   | 1.000          | -19 (-33, -1)  | <b>0.028</b>     |
| <b>Basophils</b>             |                |                |               |                |               |                |                |                  |
| Day 7 vs Day 1               | 36 (3, 79)     | <b>0.018</b>   | 35 (-10, 104) | 0.369          | 38 (-21, 139) | 1.000          | 59 (28, 97)    | <b>&lt;0.001</b> |
| Day 14 vs Day 1              | 25 (-5, 65)    | 0.241          | 19 (-20, 79)  | 1.000          | 37 (-23, 144) | 1.000          | 60 (29, 99)    | <b>&lt;0.001</b> |
| Day 21 vs Day 1              | 19 (-9, 57)    | 0.708          | 14 (-24, 72)  | 1.000          | 30 (-26, 127) | 1.000          | 31 (6, 63)     | <b>0.004</b>     |
| Day 28 vs Day 1              | 16 (-12, 54)   | 1.000          | 8 (-29, 64)   | 1.000          | 32 (-25, 132) | 1.000          | 19 (-4, 49)    | 0.223            |
| Day 14 vs Day 7              | -8 (-30, 22)   | 1.000          | -12 (-41, 33) | 1.000          | -1 (-44, 77)  | 1.000          | 1 (-19, 25)    | 1.000            |
| Day 21 vs Day 7              | -12 (-33, 16)  | 1.000          | -16 (-44, 27) | 1.000          | -6 (-46, 64)  | 1.000          | -17 (-34, 3)   | 0.140            |
| Day 28 vs Day 7              | -14 (-35, 13)  | 1.000          | -20 (-47, 21) | 1.000          | -4 (-45, 68)  | 1.000          | -25 (-40, -6)  | <b>0.003</b>     |
| Day 21 vs Day 14             | -4 (-28, 26)   | 1.000          | -4 (-36, 43)  | 1.000          | -5 (-46, 72)  | 1.000          | -18 (-34, 2)   | 0.113            |
| Day 28 vs Day 14             | -7 (-30, 23)   | 1.000          | -9 (-40, 37)  | 1.000          | -3 (-46, 72)  | 1.000          | -25 (-40, -7)  | <b>0.002</b>     |
| Day 28 vs Day 21             | -3 (-26, 28)   | 1.000          | -5 (-37, 43)  | 1.000          | 2 (-41, 77)   | 1.000          | -9 (-27, 13)   | 1.000            |
| <b>Immature granulocytes</b> |                |                |               |                |               |                |                |                  |
| Day 7 vs Day 1               | 1 (-36, 60)    | 1.000          | 20 (-36, 124) | 1.000          | -28 (-69, 69) | 1.000          | -10 (-37, 29)  | 1.000            |
| Day 14 vs Day 1              | -11 (-45, 43)  | 1.000          | 12 (-41, 111) | 1.000          | -45 (-78, 36) | 0.650          | -46 (-62, -21) | <b>&lt;0.001</b> |
| Day 21 vs Day 1              | -38 (-63, 2)   | 0.069          | -26 (-61, 43) | 1.000          | -56 (-82, 8)  | 0.101          | -60 (-73, -40) | <b>&lt;0.001</b> |
| Day 28 vs Day 1              | -53 (-73, -19) | <b>0.001</b>   | -49 (-74, 1)  | 0.059          | -59 (-84, 5)  | 0.078          | -65 (-77, -46) | <b>&lt;0.001</b> |

|                  |                |                  |                |              |               |       |                |                  |
|------------------|----------------|------------------|----------------|--------------|---------------|-------|----------------|------------------|
| Day 14 vs Day 7  | -12 (-45, 39)  | 1.000            | -6 (-50, 75)   | 1.000        | -24 (-69, 86) | 1.000 | -40 (-58, -14) | <b>0.001</b>     |
| Day 21 vs Day 7  | -39 (-62, -2)  | <b>0.034</b>     | -38 (-67, 18)  | 0.368        | -39 (-74, 45) | 1.000 | -55 (-69, -35) | <b>&lt;0.001</b> |
| Day 28 vs Day 7  | -54 (-72, -23) | <b>&lt;0.001</b> | -57 (-78, -17) | <b>0.003</b> | -43 (-77, 40) | 0.804 | -61 (-74, -42) | <b>&lt;0.001</b> |
| Day 21 vs Day 14 | -30 (-56, 10)  | 0.264            | -34 (-64, 24)  | 0.640        | -20 (-67, 93) | 1.000 | -26 (-48, 7)   | 0.210            |
| Day 28 vs Day 14 | -47 (-67, -15) | <b>0.002</b>     | -55 (-76, -13) | <b>0.006</b> | -25 (-70, 84) | 1.000 | -35 (-56, -6)  | <b>0.011</b>     |
| Day 28 vs Day 21 | -24 (-52, 19)  | 0.866            | -32 (-64, 29)  | 0.920        | -6 (-60, 119) | 1.000 | -13 (-39, 25)  | 1.000            |

### Eosinophils

|                  |                 |                  |                  |                  |                 |                  |                 |                  |
|------------------|-----------------|------------------|------------------|------------------|-----------------|------------------|-----------------|------------------|
| Day 7 vs Day 1   | 461 (224, 870)  | <b>&lt;0.001</b> | 573 (200, 1410)  | <b>&lt;0.001</b> | 313 (38, 1130)  | <b>0.003</b>     | 401 (227, 667)  | <b>&lt;0.001</b> |
| Day 14 vs Day 1  | 488 (233, 940)  | <b>&lt;0.001</b> | 572 (197, 1420)  | <b>&lt;0.001</b> | 371 (47, 1410)  | <b>0.002</b>     | 260 (132, 459)  | <b>&lt;0.001</b> |
| Day 21 vs Day 1  | 868 (440, 1640) | <b>&lt;0.001</b> | 1050 (396, 2570) | <b>&lt;0.001</b> | 595 (120, 2100) | <b>&lt;0.001</b> | 591 (338, 990)  | <b>&lt;0.001</b> |
| Day 28 vs Day 1  | 845 (408, 1660) | <b>&lt;0.001</b> | 1270 (465, 3210) | <b>&lt;0.001</b> | 357 (38, 1410)  | <b>0.004</b>     | 583 (323, 1000) | <b>&lt;0.001</b> |
| Day 14 vs Day 7  | 5 (-40, 83)     | 1.000            | 0 (-56, 124)     | 1.000            | 14 (-64, 258)   | 1.000            | -28 (-53, 11)   | 0.330            |
| Day 21 vs Day 7  | 73 (-2, 204)    | 0.064            | 71 (-25, 289)    | 0.679            | 68 (-45, 416)   | 1.000            | 38 (-12, 115)   | 0.430            |
| Day 28 vs Day 7  | 69 (-7, 205)    | 0.135            | 103 (-14, 381)   | 0.207            | 11 (-65, 251)   | 1.000            | 36 (-14, 116)   | 0.606            |
| Day 21 vs Day 14 | 65 (-5, 186)    | 0.110            | 71 (-23, 281)    | 0.596            | 48 (-53, 362)   | 1.000            | 92 (24, 196)    | <b>&lt;0.001</b> |
| Day 28 vs Day 14 | 61 (-9, 185)    | 0.197            | 104 (-11, 367)   | 0.162            | -3 (-70, 210)   | 1.000            | 89 (21, 196)    | <b>0.001</b>     |
| Day 28 vs Day 21 | -2 (-44, 69)    | 1.000            | 19 (-47, 168)    | 1.000            | -34 (-78, 96)   | 1.000            | -1 (-36, 52)    | 1.000            |

### Classical monocytes

|                  |               |              |               |       |               |       |               |       |
|------------------|---------------|--------------|---------------|-------|---------------|-------|---------------|-------|
| Day 7 vs Day 1   | 38 (-1, 92)   | 0.064        | 37 (-15, 120) | 0.670 | 38 (-28, 163) | 1.000 | 16 (-10, 51)  | 1.000 |
| Day 14 vs Day 1  | 22 (-13, 70)  | 1.000        | 6 (-34, 70)   | 1.000 | 62 (-18, 220) | 0.446 | 9 (-16, 42)   | 1.000 |
| Day 21 vs Day 1  | 29 (-8, 81)   | 0.343        | 12 (-31, 81)  | 1.000 | 70 (-12, 229) | 0.238 | -4 (-26, 26)  | 1.000 |
| Day 28 vs Day 1  | 43 (1, 102)   | <b>0.042</b> | 47 (-10, 140) | 0.289 | 41 (-28, 175) | 1.000 | -2 (-25, 29)  | 1.000 |
| Day 14 vs Day 7  | -12 (-37, 23) | 1.000        | -23 (-52, 25) | 1.000 | 18 (-40, 132) | 1.000 | -6 (-28, 22)  | 1.000 |
| Day 21 vs Day 7  | -6 (-33, 31)  | 1.000        | -18 (-50, 32) | 1.000 | 24 (-36, 138) | 1.000 | -17 (-37, 8)  | 0.455 |
| Day 28 vs Day 7  | 4 (-27, 46)   | 1.000        | 7 (-34, 76)   | 1.000 | 2 (-47, 98)   | 1.000 | -16 (-36, 10) | 0.733 |
| Day 21 vs Day 14 | 6 (-24, 48)   | 1.000        | 5 (-34, 69)   | 1.000 | 5 (-47, 105)  | 1.000 | -12 (-32, 15) | 1.000 |
| Day 28 vs Day 14 | 17 (-16, 65)  | 1.000        | 39 (-14, 125) | 0.569 | -13 (-56, 71) | 1.000 | -10 (-31, 17) | 1.000 |
| Day 28 vs Day 21 | 11 (-21, 54)  | 1.000        | 32 (-18, 112) | 1.000 | -17 (-57, 58) | 1.000 | 2 (-22, 32)   | 1.000 |

### Non-classical monocytes

|                 |              |                  |               |              |               |       |              |              |
|-----------------|--------------|------------------|---------------|--------------|---------------|-------|--------------|--------------|
| Day 7 vs Day 1  | 5 (-25, 47)  | 1.000            | -2 (-41, 61)  | 1.000        | 20 (-39, 136) | 1.000 | -2 (-24, 27) | 1.000        |
| Day 14 vs Day 1 | 43 (1, 103)  | <b>0.039</b>     | 27 (-23, 111) | 1.000        | 84 (-10, 277) | 0.163 | 36 (4, 77)   | <b>0.014</b> |
| Day 21 vs Day 1 | 78 (24, 155) | <b>&lt;0.001</b> | 69 (1, 182)   | <b>0.044</b> | 96 (-3, 297)  | 0.072 | 18 (-11, 57) | 0.953        |

|                  |              |                  |               |              |               |       |               |              |
|------------------|--------------|------------------|---------------|--------------|---------------|-------|---------------|--------------|
| Day 28 vs Day 1  | 77 (20, 160) | <b>&lt;0.001</b> | 75 (2, 198)   | <b>0.035</b> | 80 (-13, 272) | 0.230 | 38 (3, 86)    | <b>0.021</b> |
| Day 14 vs Day 7  | 36 (-3, 92)  | 0.107            | 30 (-21, 115) | 1.000        | 53 (-24, 212) | 0.894 | 38 (6, 81)    | <b>0.006</b> |
| Day 21 vs Day 7  | 69 (20, 139) | <b>&lt;0.001</b> | 73 (4, 187)   | <b>0.025</b> | 63 (-18, 226) | 0.460 | 21 (-8, 59)   | 0.565        |
| Day 28 vs Day 7  | 68 (17, 143) | <b>0.001</b>     | 79 (6, 203)   | <b>0.019</b> | 50 (-26, 204) | 1.000 | 41 (6, 88)    | <b>0.007</b> |
| Day 21 vs Day 14 | 24 (-11, 74) | 0.712            | 32 (-19, 117) | 1.000        | 6 (-47, 115)  | 1.000 | -13 (-33, 14) | 1.000        |
| Day 28 vs Day 14 | 23 (-13, 75) | 0.925            | 37 (-18, 128) | 0.825        | -2 (-52, 100) | 1.000 | 2 (-22, 34)   | 1.000        |
| Day 28 vs Day 21 | -1 (-29, 39) | 1.000            | 4 (-37, 71)   | 1.000        | -8 (-53, 80)  | 1.000 | 17 (-10, 53)  | 0.962        |

### Non-cytotoxic T lymphocytes

|                  |              |              |               |                  |               |       |              |                  |
|------------------|--------------|--------------|---------------|------------------|---------------|-------|--------------|------------------|
| Day 7 vs Day 1   | 41 (11, 80)  | <b>0.001</b> | 79 (36, 137)  | <b>&lt;0.001</b> | -6 (-36, 36)  | 1.000 | 39 (15, 68)  | <b>&lt;0.001</b> |
| Day 14 vs Day 1  | 30 (1, 66)   | <b>0.033</b> | 41 (5, 90)    | <b>0.009</b>     | 14 (-25, 72)  | 1.000 | 22 (0, 48)   | <b>0.041</b>     |
| Day 21 vs Day 1  | 34 (4, 72)   | <b>0.011</b> | 61 (17, 121)  | <b>&lt;0.001</b> | -5 (-39, 47)  | 1.000 | 41 (16, 72)  | <b>&lt;0.001</b> |
| Day 28 vs Day 1  | 43 (11, 86)  | <b>0.001</b> | 62 (13, 132)  | <b>0.002</b>     | 11 (-32, 80)  | 1.000 | 63 (33, 99)  | <b>&lt;0.001</b> |
| Day 14 vs Day 7  | -8 (-28, 18) | 1.000        | -21 (-40, 4)  | 0.172            | 21 (-18, 80)  | 1.000 | -13 (-28, 6) | 0.493            |
| Day 21 vs Day 7  | -5 (-26, 21) | 1.000        | -10 (-33, 21) | 1.000            | 1 (-32, 51)   | 1.000 | 1 (-17, 23)  | 1.000            |
| Day 28 vs Day 7  | 2 (-21, 31)  | 1.000        | -10 (-35, 25) | 1.000            | 18 (-24, 83)  | 1.000 | 17 (-4, 43)  | 0.284            |
| Day 21 vs Day 14 | 3 (-19, 32)  | 1.000        | 14 (-14, 50)  | 1.000            | -17 (-44, 24) | 1.000 | 16 (-4, 41)  | 0.303            |
| Day 28 vs Day 14 | 11 (-14, 42) | 1.000        | 14 (-15, 54)  | 1.000            | -3 (-36, 48)  | 1.000 | 34 (10, 63)  | <b>&lt;0.001</b> |
| Day 28 vs Day 21 | 7 (-16, 37)  | 1.000        | 10 (-24, 33)  | 1.000            | 17 (-20, 70)  | 1.000 | 15 (-5, 39)  | 0.391            |

### Cytotoxic T/NK lymphocytes

|                  |               |                  |               |                  |               |       |               |                  |
|------------------|---------------|------------------|---------------|------------------|---------------|-------|---------------|------------------|
| Day 7 vs Day 1   | -34 (-56, -2) | <b>0.029</b>     | -22 (-55, 35) | 1.000            | -50 (-76, 6)  | 0.093 | -18 (-39, 11) | 0.683            |
| Day 14 vs Day 1  | -8 (-39, 39)  | 1.000            | -1 (-43, 71)  | 1.000            | -15 (-61, 85) | 1.000 | -13 (-36, 20) | 1.000            |
| Day 21 vs Day 1  | 59 (3, 144)   | <b>0.026</b>     | 118 (26, 277) | <b>0.001</b>     | -13 (-59, 84) | 1.000 | 13 (-19, 59)  | 1.000            |
| Day 28 vs Day 1  | 71 (7, 171)   | <b>0.012</b>     | 120 (26, 282) | <b>0.001</b>     | 5 (-50, 122)  | 1.000 | 51 (6, 116)   | <b>0.011</b>     |
| Day 14 vs Day 7  | 40 (-6, 109)  | 0.175            | 27 (-27, 122) | 1.000            | 70 (-22, 272) | 0.580 | 7 (-22, 46)   | 1.000            |
| Day 21 vs Day 7  | 141 (60, 262) | <b>&lt;0.001</b> | 180 (61, 387) | <b>&lt;0.001</b> | 74 (-18, 269) | 0.390 | 38 (0, 91)    | 0.051            |
| Day 28 vs Day 7  | 159 (68, 301) | <b>&lt;0.001</b> | 182 (61, 395) | <b>&lt;0.001</b> | 110 (-1, 346) | 0.057 | 85 (31, 159)  | <b>&lt;0.001</b> |
| Day 21 vs Day 14 | 72 (16, 155)  | <b>0.001</b>     | 120 (27, 281) | <b>0.001</b>     | 2 (-53, 124)  | 1.000 | 30 (-5, 78)   | 0.199            |
| Day 28 vs Day 14 | 85 (22, 180)  | <b>&lt;0.001</b> | 122 (27, 287) | <b>0.001</b>     | 24 (-43, 170) | 1.000 | 73 (25, 139)  | <b>&lt;0.001</b> |
| Day 28 vs Day 21 | 18 (-27, 60)  | 1.000            | 1 (-42, 76)   | 1.000            | 21 (-43, 155) | 1.000 | 33 (-2, 82)   | 0.092            |

### B lymphocytes

|                 |               |       |               |       |               |       |              |       |
|-----------------|---------------|-------|---------------|-------|---------------|-------|--------------|-------|
| Day 7 vs Day 1  | 4 (-33, 63)   | 1.000 | 32 (-20, 118) | 1.000 | -32 (-66, 34) | 1.000 | -2 (-31, 39) | 1.000 |
| Day 14 vs Day 1 | 44 (-12, 137) | 0.389 | 39 (-22, 146) | 1.000 | 59 (-29, 256) | 1.000 | 19 (-19, 74) | 1.000 |

|                  |               |       |               |       |                |              |               |       |
|------------------|---------------|-------|---------------|-------|----------------|--------------|---------------|-------|
| Day 21 vs Day 1  | 57 (-11, 176) | 0.246 | 70 (-14, 234) | 0.281 | 36 (-46, 243)  | 1.000        | 14 (-26, 76)  | 1.000 |
| Day 28 vs Day 1  | 56 (-19, 199) | 0.559 | 65 (-26, 270) | 0.794 | 40 (-53, 319)  | 1.000        | 39 (-16, 129) | 0.641 |
| Day 14 vs Day 7  | 38 (-12, 118) | 0.447 | 5 (-36, 74)   | 1.000 | 135 (16, 376)  | <b>0.007</b> | 21 (-15, 72)  | 1.000 |
| Day 21 vs Day 7  | 51 (-8, 147)  | 0.205 | 29 (-28, 129) | 1.000 | 100 (-9, 338)  | 0.129        | 16 (-22, 71)  | 1.000 |
| Day 28 vs Day 7  | 50 (-15, 165) | 0.475 | 25 (-37, 149) | 1.000 | 106 (-19, 421) | 0.289        | 41 (-9, 120)  | 0.282 |
| Day 21 vs Day 14 | 9 (-31, 71)   | 1.000 | 22 (-25, 101) | 1.000 | -15 (-58, 72)  | 1.000        | -4 (-33, 37)  | 1.000 |
| Day 28 vs Day 14 | 8 (-35, 79)   | 1.000 | 19 (-33, 113) | 1.000 | -12 (-61, 96)  | 1.000        | 17 (-21, 73)  | 1.000 |
| Day 28 vs Day 21 | -1 (-37, 56)  | 1.000 | -3 (-41, 61)  | 1.000 | 3 (-48, 102)   | 1.000        | 22 (-14, 74)  | 1.000 |

---
